# Supplementary material for: The Influence of Serum Uric Acid on Risks of Major Adverse Cardiovascular Events in Patients with Acute Coronary Syndrome
Source: Research Square preprint supplement (doi:10.21203/rs.3.rs-7514499/v1), 2025-09-17
Supplement: Supplementary file 1 [file a97c797929fdd3183390904e.docx]

**Supplementary Table.** The OR and the 95% CI for the backward stepwise multiple logistic regression models used to predict major adverse cardiovascular events.

|  | Multivariable model | | | |
| --- | --- | --- | --- | --- |
|  | OR | 95% CI | | *p*-value |
| Model 1 |  |  |  |  |
| SUA ≥ 7.25 mg/dL | 1.553 | .999 | 2.413 | 0.0503 |
| Age | 1.014 | .998 | 1.030 | 0.0792 |
| Hypertension | 1.378 | .893 | 2.125 | 0.1475 |
| Diabetes mellitus | 1.053 | .679 | 1.633 | 0.8167 |
| Chronic kidney disease | 1.130 | .616 | 2.071 | 0.6932 |
| Uremia | 2.266 | 1.014 | 5.061 | 0.0461 |
| Atrial fibrillation | 1.782 | .919 | 3.458 | 0.0874 |
| Heart failure | 1.375 | .764 | 2.477 | 0.2882 |
| BMS | 1.322 | .819 | 2.134 | 0.2537 |
| DES | .735 | .459 | 1.176 | 0.1985 |
| LVEF | .998 | .973 | 1.025 | 0.9091 |
| Number of diseased vessels | 1.666 | 1.283 | 2.163 | 0.0001 |
| Model 2 |  |  |  |  |
| SUA ≥ 7.25 mg/dL | 1.558 | 1.007 | 2.411 | 0.0463 |
| Age | 1.014 | .998 | 1.030 | 0.0790 |
| Hypertension | 1.375 | .892 | 2.118 | 0.1488 |
| Diabetes mellitus | 1.057 | .684 | 1.633 | 0.8044 |
| Chronic kidney disease | 1.131 | .617 | 2.073 | 0.6912 |
| Uremia | 2.280 | 1.028 | 5.056 | 0.0426 |
| Atrial fibrillation | 1.780 | .918 | 3.451 | 0.0880 |
| Heart failure | 1.394 | .810 | 2.397 | 0.2303 |
| BMS | 1.322 | .819 | 2.134 | 0.2537 |
| DES | .735 | .459 | 1.176 | 0.1986 |
| Number of diseased vessels | 1.668 | 1.285 | 2.164 | 0.0001 |
| Model 3 |  |  |  |  |
| SUA ≥ 7.25 mg/dL | 1.563 | 1.011 | 2.417 | 0.0445 |
| Age | 1.014 | .998 | 1.029 | 0.0803 |
| Hypertension | 1.387 | .906 | 2.124 | 0.1324 |
| Chronic kidney disease | 1.143 | .627 | 2.083 | 0.6636 |
| Uremia | 2.304 | 1.043 | 5.090 | 0.0391 |
| Atrial fibrillation | 1.802 | .936 | 3.468 | 0.0779 |
| Heart failure | 1.399 | .814 | 2.404 | 0.2248 |
| BMS | 1.321 | .818 | 2.134 | 0.2545 |
| DES | .738 | .462 | 1.180 | 0.2044 |
| Number of diseased vessels | 1.673 | 1.291 | 2.168 | 0.0001 |
| Model 4 |  |  |  |  |
| SUA ≥ 7.25 mg/dL | 1.602 | 1.052 | 2.440 | 0.0282 |
| Age | 1.014 | .999 | 1.030 | 0.0602 |
| Hypertension | 1.389 | .907 | 2.127 | 0.1308 |
| Uremia | 2.320 | 1.050 | 5.129 | 0.0376 |
| Atrial fibrillation | 1.811 | .942 | 3.484 | 0.0751 |
| Heart failure | 1.411 | .822 | 2.423 | 0.2121 |
| BMS | 1.313 | .814 | 2.119 | 0.2639 |
| DES | .738 | .462 | 1.179 | 0.2039 |
| Number of diseased vessels | 1.686 | 1.305 | 2.180 | 0.0001 |
| Model 5 |  |  |  |  |
| SUA ≥ 7.25 mg/dL | 1.603 | 1.052 | 2.441 | 0.0281 |
| Age | 1.014 | .999 | 1.030 | 0.0624 |
| Hypertension | 1.368 | .894 | 2.093 | 0.1487 |
| Uremia | 2.249 | 1.018 | 4.968 | 0.0451 |
| Atrial fibrillation | 1.721 | .901 | 3.288 | 0.1001 |
| Heart failure | 1.367 | .797 | 2.344 | 0.2560 |
| DES | .653 | .430 | .992 | 0.0458 |
| Number of diseased vessels | 1.724 | 1.338 | 2.221 | 0.0000 |
| Model 6 |  |  |  |  |
| SUA ≥ 7.25 mg/dL | 1.636 | 1.076 | 2.487 | 0.0212 |
| Age | 1.015 | 1.000 | 1.030 | 0.0465 |
| Hypertension | 1.335 | .875 | 2.038 | 0.1801 |
| Uremia | 2.419 | 1.106 | 5.292 | 0.0270 |
| Atrial fibrillation | 1.847 | .978 | 3.488 | 0.0587 |
| DES | .634 | .419 | .959 | 0.0308 |
| Number of diseased vessels | 1.740 | 1.351 | 2.241 | 0.0000 |
| Model 7 |  |  |  |  |
| SUA ≥ 7.25 mg/dL | 1.686 | 1.112 | 2.556 | 0.0139 |
| Age | 1.018 | 1.003 | 1.033 | 0.0174 |
| Uremia | 2.487 | 1.134 | 5.455 | 0.0230 |
| Atrial fibrillation | 1.880 | .995 | 3.550 | 0.0517 |
| DES | .626 | .414 | .945 | 0.0259 |
| Number of diseased vessels | 1.731 | 1.345 | 2.228 | 0.0000 |
| Model 8 |  |  |  |  |
| SUA ≥ 7.25 mg/dL | 1.639 | 1.084 | 2.477 | 0.0191 |
| Age | 1.019 | 1.005 | 1.034 | 0.0087 |
| Uremia | 2.692 | 1.245 | 5.820 | 0.0118 |
| DES | 0.591 | 0.394 | 0.888 | 0.0114 |
| Number of diseased vessels | 1.716 | 1.334 | 2.208 | <.0001 |

OR: odds ratio; CI: confidence interval; SUA, serum uric acid; BMS, bare-metal stent; DES, drug-eluting stent; and LVEF, left ventricular ejection fraction.
